# Supplementary material for: Thinking outside the CaaX-box: an unusual reversible prenylation on ALDH9A1
Source: Royal Society of Chemistry journal article supplement (doi:10.1039/d3cb00089c), 2023-01-01
Supplement: d3cb00089c1.pdf [file d3cb00089c1.pdf]

## Supporting Information

### Thinking outside the CaaX-box: an unusual reversible prenylation on ALDH9A1

Kiall F. Suazo,<sup>a</sup> Jakub Bělíček<sup>b</sup>, Garrett L. Schey<sup>c</sup>, Shelby A. Auger<sup>a</sup>, Alexandru M. Petre,<sup>a</sup> Ling Li<sup>d</sup>, Katarzyna M. Błażewska<sup>e</sup>, David Kopečný<sup>b</sup> and Mark D. Distefano<sup>a\*</sup>

<sup>a</sup>Department of Chemistry, University of Minnesota, Minneapolis, MN 55455 USA

<sup>b</sup>Department of Experimental Biology, Faculty of Science, Palacký University, CZ-78371, Czech Republic

<sup>c</sup>Department of Medicinal Chemistry, University of Minnesota, Minneapolis, MN 55455 USA

<sup>d</sup>Department of Experimental and Clinical Pharmacology, University of Minnesota, Minneapolis, MN, 55455, USA

<sup>e</sup>Institute of Organic Chemistry, Faculty of Chemistry, Lodz University of Technology, Łódź, Poland

### Table of Contents

|                                                                                                                                                      |   |
|------------------------------------------------------------------------------------------------------------------------------------------------------|---|
| <b>Figure S1.</b> In-gel fluorescence analysis of GFP-ALDH9A1-expressing COS-7 lysates metabolically labeled with C15AlkCHO. ....                    | 2 |
| <b>Figure S2.</b> Extracted ion chromatograms corresponding the unmodified (A) and C15Alkthioester-modified (B) active site peptide of ALDH9A1. .... | 2 |
| <b>Figure S3.</b> Saturation curve for citral with ALDH9A1 .....                                                                                     | 3 |
| <b>Figure S4.</b> MST binding curve for meldonium and TMABAL.....                                                                                    | 3 |
| <b>Figure S5.</b> Inhibition of ALDH9A1 with farnesal and citral .....                                                                               | 4 |
| <b>Figure S6.</b> Structures of ALDH9A1 .....                                                                                                        | 4 |
| <b>Figure S7.</b> Possible structures involving Michael addition to C-3 of farnesal by Cys289.....                                                   | 5 |
| <b>Figure S8.</b> Electrostatic potential surface of ALDH9A1.....                                                                                    | 5 |
| <b>Table S1.</b> Fragment ions of the ALDH9A1 active site tryptic peptide obtained without and with thioester modification .....                     | 6 |
| <b>Table S2.</b> Kinetic constants of ALDH9A1 for citral.....                                                                                        | 7 |
| <b>Sequences of primers used for mutation</b> .....                                                                                                  | 7 |
| <b>References</b> .....                                                                                                                              | 7 |

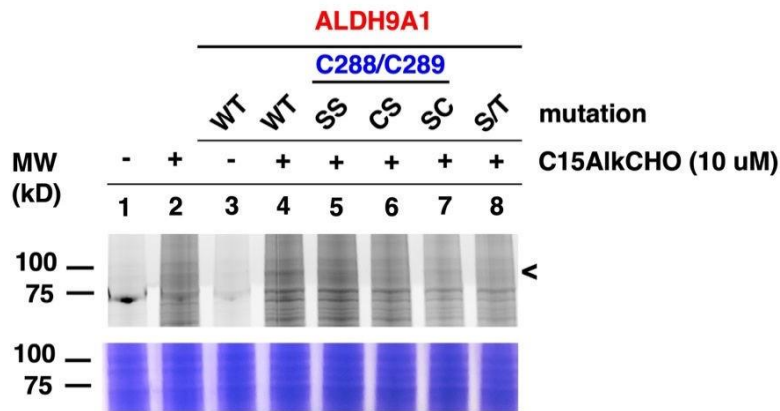

**Figure S1.** In-gel fluorescence analysis of GFP-ALDH9A1-expressing COS-7 lysates metabolically labeled with C15AlkCHO.

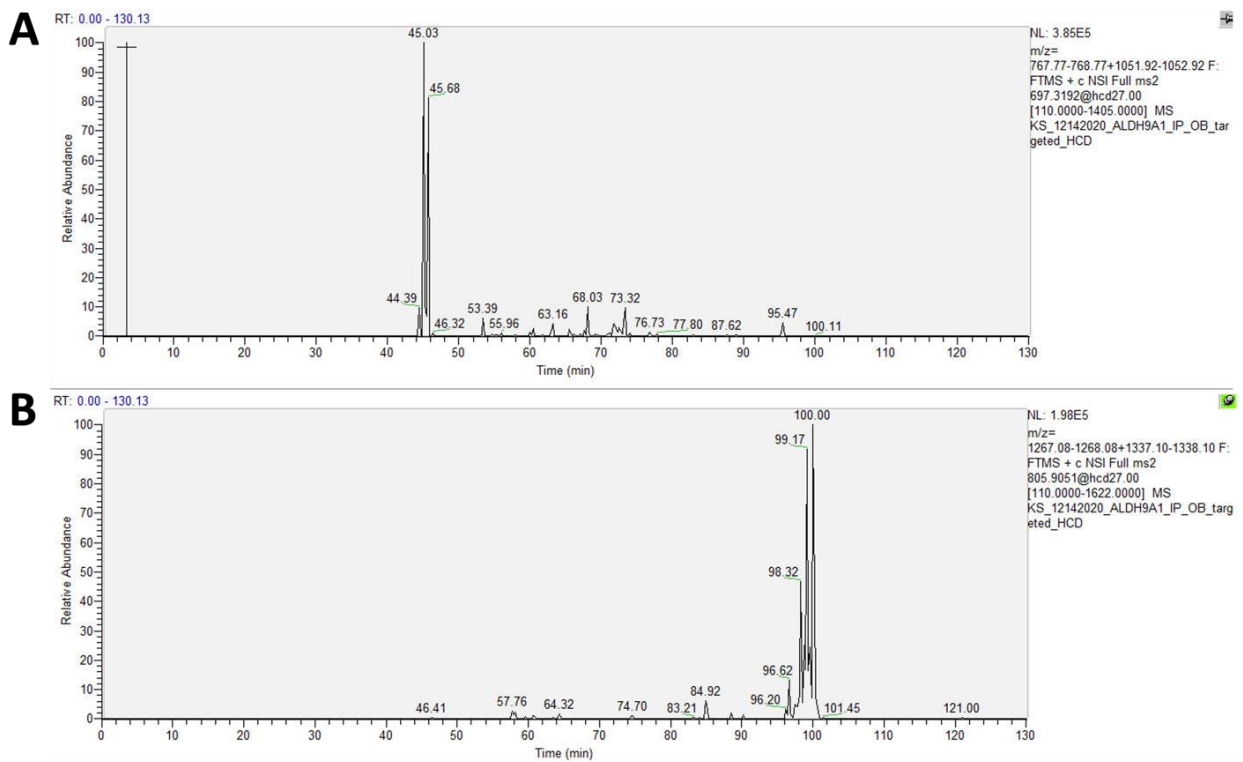

**Figure S2.** Extracted ion chromatograms corresponding to unmodified (A) and C15Alkthioester-modified (B) active site peptide of ALDH9A1.

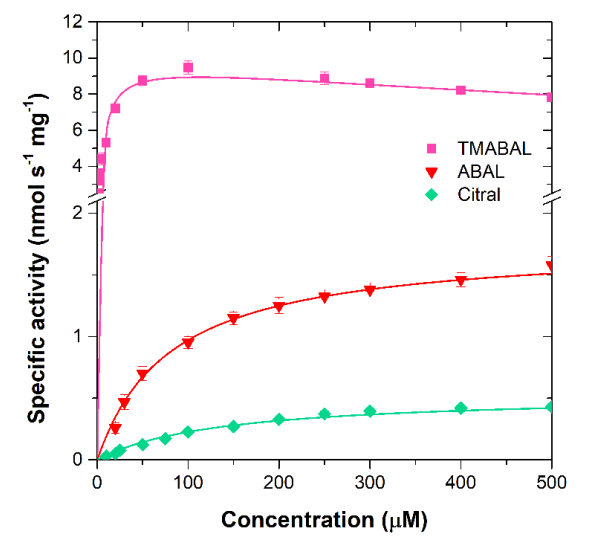

**Figure S3.** Saturation curve for citral with ALDH9A1. The data were measured using saturating 1.0 mM concentration of NAD<sup>+</sup> in 150 mM sodium pyrophosphate, pH 7.0 Curves for TMABAL and ABAL were previously published and are shown for comparison (Končítíková et al., 2019).

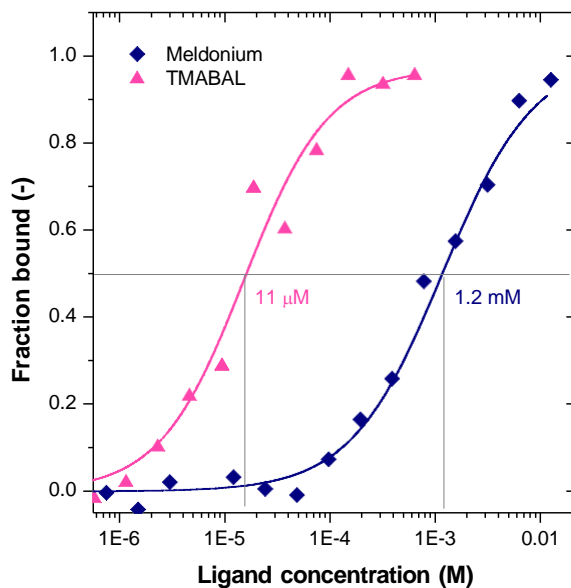

**Figure S4.** MST binding curve for meldonium and TMABAL. The ALDH9A1 was fluorescently labeled for the measurement. Binding curve of TMABAL is colored in pink, meldonium is in blue,  $K_D$  values are indicated.

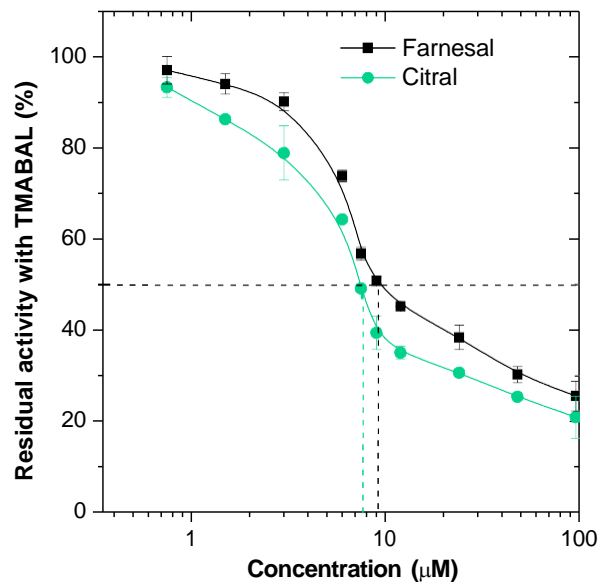

**Figure S5.** Inhibition of ALDH9A1 with farnesal and citral using TMABAL as a substrate. The data were measured with 6  $\mu\text{M}$  TMABAL, 1.0 mM  $\text{NAD}^+$  in 150 mM sodium pyrophosphate, pH 7.5 containing 1.0 mM  $\text{NAD}^+$  at 30  $^{\circ}\text{C}$ .

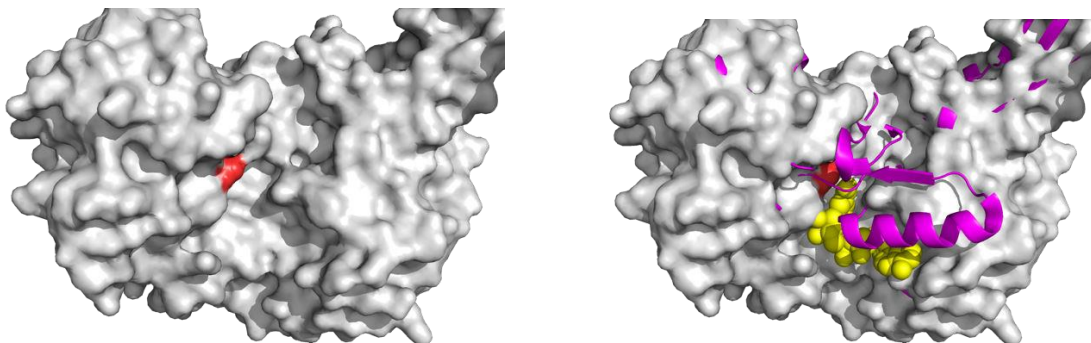

**Figure S6.** Structures of ALDH9A1. Left: Structure of enzyme in the absence of  $\text{NAD}^+$  (pdb code 6QAP). Right: Structure of enzyme in the presence of  $\text{NAD}^+$  (pdb code 6VR6). Color scheme: enzyme in the absence of  $\text{NAD}^+$  (grey); Cys288 (red); Enzyme in the presence of  $\text{NAD}^+$  (magenta);  $\text{NAD}^+$  (yellow).

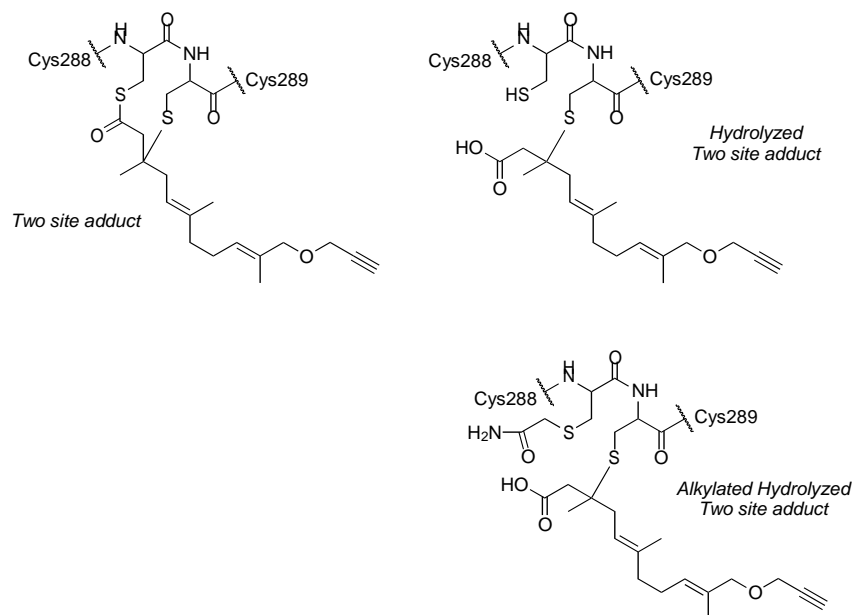

**Figure S7.** Possible structures involving Michael addition to C-3 of farnesal by Cys289. The “Two site adduct” would result from Michael addition prior to the proteomic work flow that includes iodoacetamide alkylation. If hydrolysis of the thioester occurred after the iodoacetamide alkylation, the “Hydrolyzed Two site adduct” would be present. If hydrolysis of the thioester occurred before the iodoacetamide alkylation step, the “Alkylated Hydrolyzed Two site adduct” would be present. None of these adducts were detected although it should be noted that the ionization of the observed thioester adduct was poor.

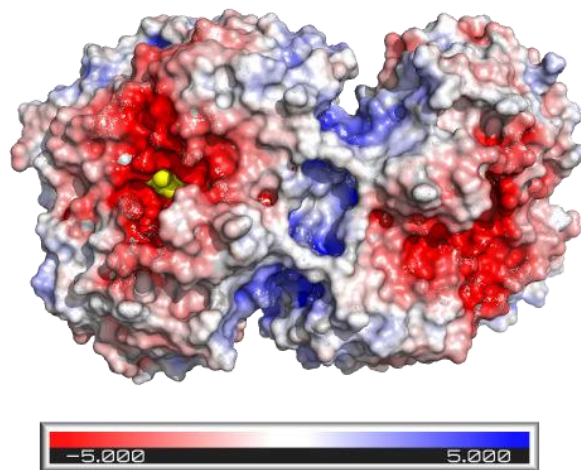

**Figure S8.** Electrostatic potential surface of ALDH9A1. The surface of ALDH9A1 (pdb code 6VR6) was calculated in Pymol and colored as noted in the legend. Farnesal (yellow) was docked into the active site and manually adjusted to bond with Cys288. ALDH9A1 is a dimer and this view looks down close to the C2 symmetry axis. Note that most of the farnesal group is sequestered by the enzyme and is hence not solvent accessible. The negatively charged surface in the vicinity of the bound farnesal is also noteworthy since it would be repulsive towards the membrane

**Table S1.** Fragment ions of the ALDH9A1 active site tryptic peptide obtained without and with thioester modification.

| Ion Type | C288(Cam),C289(Cam) <sup>a</sup> |           |           | C288(C15Alkthioester),C289(Cam) <sup>a</sup> |           |           |
|----------|----------------------------------|-----------|-----------|----------------------------------------------|-----------|-----------|
|          | m/z                              | intensity | m/z error | m/z                                          | intensity | m/z error |
| b2+      | 215.1390                         | 14.6832   | -1.1526   | 215.1390                                     | 4.7479    | -0.0835   |
| b3+      | 343.1976                         | 5.7959    | 0.3224    | 343.1976                                     | 1.7322    | 2.0123    |
| b4+      | 400.2190                         | 6.2064    | -0.2760   | 400.2190                                     | 2.1554    | 2.0227    |
| b5+      | 528.2776                         | 10.2154   | -0.4011   | 528.2776                                     | 3.6567    | 1.1133    |
| b6+      | 627.3460                         | 10.8375   | -0.6066   | 627.3460                                     | 3.3977    | 2.1191    |
| b7+      | 787.3767                         | 1.9539    | -0.1713   | 1002.5328                                    | -         | -         |
| b8+      | 947.4073                         | 1.0288    | 2.2280    | 1162.5635                                    | -         | -         |
| b9+      | 1062.4342                        | 3.9907    | -1.8800   | 1277.5904                                    | -         | -         |
| b11+     | 1220.5034                        | 1.1269    | 0.3260    | 1435.6595                                    | -         | -         |
| b11++    | 610.7553                         | 0.5195    | 16.2246   | 718.3334                                     | -         | -         |
| y1+      | 175.1189                         | 5.0454    | -1.5034   | 175.1189                                     | 1.9810    | -0.3613   |
| y2+      | 276.1666                         | 2.2817    | 0.1562    | 276.1666                                     | 1.6655    | 1.3511    |
| y3+      | 333.1881                         | 18.8114   | 0.0061    | 333.1881                                     | 15.4811   | 0.9365    |
| y4+      | 448.2150                         | 8.3148    | 0.0978    | 448.2150                                     | 10.3656   | 0.7002    |
| y5+      | 608.2457                         | 23.3810   | -0.4940   | 608.2457                                     | 11.1590   | 0.6075    |
| y6+      | 768.2763                         | 91.2758   | -0.7091   | 983.4325                                     | 11.1932   | 0.1629    |
| y6++     | 384.6418                         | 1.8886    | -0.8076   | 492.2199                                     | -         | -         |
| y7+      | 867.3447                         | 60.3675   | -0.6842   | 1082.5009                                    | 7.6610    | -0.9131   |
| y7++     | 434.1760                         | 1.1442    | -0.4260   | 541.7541                                     | -         | -         |
| y8+      | 995.4033                         | 22.1949   | -0.6378   | 1210.5594                                    | 1.8784    | 0.0084    |
| y8++     | 498.2053                         | 1.8408    | 0.0187    | 605.7834                                     | 0.0000    | 0.0000    |
| y9+      | 1052.4247                        | 100.0000  | -1.4500   | 1267.5809                                    | 10.4304   | 0.8907    |
| y9++     | 526.7160                         | 1.8801    | -0.4770   | 634.2941                                     | -         | -         |
| y10+     | 1180.4833                        | 28.8661   | -1.8953   | 1395.6395                                    | 1.7641    | -0.9260   |
| y10++    | 590.7453                         | 66.1492   | -0.2995   | 698.3234                                     | 0.7228    | -3.6866   |
| y11+     | 1281.5310                        | 2.6356    | -3.6058   | 1496.6871                                    | -         | -         |
| y11++    | 641.2691                         | 32.1587   | 0.1501    | 748.8472                                     | -         | -         |

<sup>a</sup>C288(Cam)C289(Cam) refers to the peptide where both cysteine residues have been alkylated with carboxamidomethyl groups at positions 288 and 289, respective whereas C288(C15Alkthioester)C289(Cam) refers to the peptide where Cys288 has a thioester and Cys289 has a carboxamidomethyl group.

**Table S2.** Kinetic constants of ALDH9A1 for citral. The data were measured with 1.0 mM NAD<sup>+</sup> in 150 mM sodium pyrophosphate, pH 7.5 at 30 °C. \*The values for TMABAL and ABAL were previously published (Končítíková et al., 2019).

| Ligand  | $K_m$<br>( $\mu$ M) | $V_{max}$<br>(nmol s <sup>-1</sup> mg <sup>-1</sup> ) | $V_{max}/K_m$<br>(relative) |
|---------|---------------------|-------------------------------------------------------|-----------------------------|
| TMABAL* | 6 ± 1               | 9.8 ± 0.4                                             | 100                         |
| ABAL*   | 67 ± 7              | 1.8 ± 0.1                                             | 1.6                         |
| Citral  | 136 ± 15            | 0.54 ± 0.03                                           | 0.2                         |

### Sequences of primers used for mutation

C288S/C289S:

Forward: 5'-AAT ACT CTT GTG CCA TTA GAG GAA ACC TGG CCT TGT GTG A-3'  
Reverse: 5'-TCA CAC AAG GCC AGG TTT CCT CTA ATG GCA CAA GAG TAT T-3'

CS: C289S

Forward: 5'-ACA CAA GGC CAG GTT TGC TCT AAT GGC ACA AGA GTA TTG-3'  
Reverse: 5'-AAT ACT CTT GTG CCA TTA GAG CAA ACC TGG CCT TGT GTG AG-3'

SC: C288S

Forward: 5'-CTC ACA CAA GGC CAG GTT AGC TGT AAT GGC ACA AG-3'  
Reverse: 5'-CTT GTG CCA TTA CAG CTA ACC TGG CCT TGT GTG AG-3'

### References

Končítíková, R.; Vigouroux, A.; Kopečná, M.; Šebela, M.; Moréra, S.; Kopečný, D. Kinetic and Structural Analysis of Human ALDH9A1. *Biosci. Rep.* **2019**, 39 (4), BSR20190558. <https://doi.org/10.1042/BSR20190558>.
